# Supplementary material
Source: HighWire-hosted journal article supplement (https://erj.ersjournals.com/content/60/6/2201690)
Supplement: inline-supplementary-material-1 [file inline-supplementary-material-1.pdf]

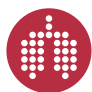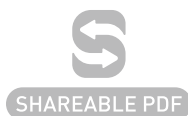

# Combining digital adherence technology and therapeutic drug monitoring for personalised tuberculosis care

Samiksha Ghimire<sup>1</sup>, Deni Iskandar<sup>2</sup>, Roelina van der Borg-Boekhout<sup>3</sup>, Marina Zenina<sup>3</sup>, Mathieu S. Bolhuis<sup>1</sup>, Huib A.M. Kerstjens<sup>1,4</sup>, Marieke van Rossum<sup>3</sup>, Daan J. Touw<sup>1,5,6</sup>, Tanja R. Zijp<sup>1</sup>, Job F.M. van Boven<sup>1,5</sup> and Onno W. Akkerman<sup>1,3,4</sup>

<sup>1</sup>Department of Clinical Pharmacy and Pharmacology, University Medical Center Groningen, University of Groningen, Groningen, The Netherlands. <sup>2</sup>Unit of Global Health, Department of Health Sciences, University Medical Center Groningen, University of Groningen, Groningen, The Netherlands. <sup>3</sup>TB center Beatrixoord, Haren, University Medical Center Groningen, University of Groningen, Groningen, The Netherlands. <sup>4</sup>Department of Pulmonary Diseases and Tuberculosis, University Medical Center Groningen, University of Groningen, Groningen, The Netherlands. <sup>5</sup>Medication Adherence Expertise Center Of the northern Netherlands (MAECON), Groningen, The Netherlands. <sup>6</sup>Institute of Pharmacy, Department of Pharmaceutical Analysis, University of Groningen, Groningen, The Netherlands.

Corresponding author: Job F.M. van Boven ([j.f.m.van.boven@umcg.nl](mailto:j.f.m.van.boven@umcg.nl))

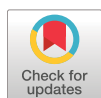

Shareable abstract (@ERSpublications)

Digital adherence technology in combination with therapeutic drug monitoring could aid in supporting adherence and personalising dosing while at the same time supporting patients to carry out TB medication related tasks independently <https://bit.ly/3gh1A1c>

**Cite this article as:** Ghimire S, Iskandar D, van der Borg-Boekhout R, *et al.* Combining digital adherence technology and therapeutic drug monitoring for personalised tuberculosis care. *Eur Respir J* 2022; 60: 2201690 [DOI: 10.1183/13993003.01690-2022].

This single-page version can be shared freely online.

Copyright ©The authors 2022.  
For reproduction rights and  
permissions contact  
[permissions@ersnet.org](mailto:permissions@ersnet.org)

Received: 29 Aug 2022  
Accepted: 14 Oct 2022

## To the Editor:

Tuberculosis (TB) is the world's leading cause of infectious disease-related mortality, apart from COVID-19 presently [1]. Standard TB treatment for drug-susceptible (DS) TB takes 6–9 months and requires daily intake of multiple medications [1]. Notably, proper treatment adherence is essential for successful treatment outcome [1, 2]. To improve adherence, counselling and education are important. For specific patient groups, such as those with drug-resistant TB, HIV co-infection and those on intermittent treatment regimens, the World Health Organization (WHO) advises to use the Directly Observed Treatment (DOT) strategy. However, even with DOT, treatment completion is still challenging and cure rates and outcomes remain suboptimal [3]. Therefore, exploring novel options to monitor treatment adherence and optimise TB drug dosing are required [2, 3]. Digital adherence technology (DAT) and therapeutic drug monitoring (TDM) have been applied as stand-alone options [4–8], yet combining both could further personalise TB care while supporting patients' self-management and autonomy, and improve outcomes [2, 9]. Therefore, this study aimed to investigate if DAT is feasible as a novel tool to monitor medication adherence and guide TDM in TB patients.
